1 **Choosing memory retrieval strategies:**  
2 **a critical role for inhibition in the dentate gyrus**

3  
4  
5 Anne Albrecht<sup>a,1</sup>, Iris Müller<sup>b,c,2</sup>, Alicé Weiglein<sup>a</sup>, Evangelia Pollali<sup>b,c</sup>, Gürsel Çalışkan<sup>b,c</sup> and  
6 Oliver Stork<sup>b,c</sup>

7  
8  
9  
10 <sup>a</sup> Institute of Anatomy, Otto-von-Guericke-University, Leipziger Str. 44, 39120 Magdeburg,  
11 Germany; [anne.albrecht@med.ovgu.de](mailto:anne.albrecht@med.ovgu.de); [alice.weiglein@med.ovgu.de](mailto:alice.weiglein@med.ovgu.de)

12 <sup>b</sup> Institute of Biology, Otto-von-Guericke-University Leipziger Str. 44, 39120 Magdeburg,  
13 Germany; [evangelia.pollali@ovgu.de](mailto:evangelia.pollali@ovgu.de); [guersel.caliskan@ovgu.de](mailto:guersel.caliskan@ovgu.de); [oliver.stork@ovgu.de](mailto:oliver.stork@ovgu.de)

14 <sup>c</sup> Center for Behavioral Brain Sciences (CBBS), Universitätsplatz 2, 39106 Magdeburg,  
15 Germany

16  
17 <sup>1</sup> *corresponding author*: Anne Albrecht

18 Institute of Anatomy, Otto-von-Guericke-University, Leipziger Str. 44, 39120 Magdeburg,  
19 Germany; [anne.albrecht@med.ovgu.de](mailto:anne.albrecht@med.ovgu.de), Tel.: +49 391 6713604, Fax: +49 391 6713604

20  
21 <sup>2</sup> *current address*: Institute of Pharmacology and Toxicology, Otto-von-Guericke-University  
22 Leipziger Str. 44, 39120 Magdeburg, Germany, [iris1.mueller@med.ovgu.de](mailto:iris1.mueller@med.ovgu.de)

23  
24  
25  
26  
27 Number of words in abstract: 222

28 Number of words in main body of text: 6329

29 Number of figures: 4

30 Number of tables: 0

31 Number of supplementary figures: 6

32

1 **Abstract**

2

3 Remembering the location of food is essential for survival. Rodents and humans employ  
4 mainly hippocampus-dependent spatial strategies, but when being stressed they shift to  
5 striatum-mediated stimulus-based strategies. To investigate underlying brain circuits, we  
6 tested mice with a heightened stress susceptibility due to a lack of the GABA-synthetizing  
7 enzyme GAD65 (GAD65<sup>-/-</sup> mice) in a dual solution task. Here, GAD65<sup>-/-</sup> mice preferred to  
8 locate a food reward in an open field via a proximal cue, while their wildtype littermates  
9 preferred a spatial strategy. The analysis of cFos co-activation across brain regions and of  
10 stress-induced mRNA expression changes of GAD65 pointed towards the hippocampal dorsal  
11 dentate gyrus (dDG) as a central structure for mediating stress effects on strategy choices via  
12 GAD65. Reducing the GAD65 expression locally in the dDG by a shRNA mediated knock down  
13 was sufficient to replicate the phenotype of the global GAD65 knock out and to increase dDG  
14 excitability. Using DREADD vectors to specifically interfere with dDG circuit activity during  
15 dual solution retrieval but not learning confirmed that the dDG modulates strategy choices  
16 and that a balanced excitability of this structure is necessary to establish spatial strategy  
17 preference. These data highlight the dDG as a critical hub for choosing between spatial and  
18 non-spatial foraging strategies.

19

20 **Keywords:** spatial learning, stimulus-based learning, cognitive flexibility, dentate gyrus,  
21 GAD65, inhibition

22

23 **Abbreviations:** ACC: anterior cingulate cortex; BLA: basolateral amygdala; CA: Cornu  
24 ammonis; CeA: central amygdala; CNO: clozapine-N-oxide; CORT: corticosterone; dDG:  
25 dorsal dentate gyrus; DREADD: designer receptors exclusively activated by designer drugs;  
26 fEPSP: field postsynaptic potentials; GAD65: glutamic acid decarboxylating enzyme, 65 kDa  
27 isoform; GR: glucocorticoid receptors; LA: lateral amygdala; mPFC: medial prefrontal cortex;  
28 MR: mineralocorticoid receptors; PL/IL: Pre-/ Infralimbic cortex

## 1        **1. Introduction**

2

3        Remembering the location of a food source is indispensable for survival. Navigating to such a  
4        location can be achieved via different neuronal systems dependent on the underlying  
5        information processing and operations performed. Rodents and humans deploy two major  
6        strategies: They can form an internal map by learning spatial relationships between  
7        landmarks or they use a stimulus response strategy, where a sequence of motor events  
8        needs to be performed upon specific cues, e.g. turn right at the gas station and then left at  
9        the bakery (Packard and Goodman, 2012). While the spatial strategy involves the  
10       hippocampus and medial temporal lobe structures, the cue response strategy activates the  
11       dorsal striatum (Goodman, 2021; Packard and Goodman, 2013). Moreover, studies in human  
12       and rodents demonstrate that prefrontal cortical areas are involved in processing stimulus-  
13       reward associations and in choosing specific actions upon these stimuli. Together with  
14       cingulate cortical areas, they also process cue- and spatial-related information such as the  
15       position of landmarks or of the own position in space. By forming a network with the  
16       hippocampus and striatum, prefrontal and cingulate cortical areas mediate choosing spatial  
17       or cue-based response strategies when navigating to a reward (Cowen et al., 2012;  
18       Kennerley et al., 2006; Rich and Shapiro, 2009; Rudebeck and Izquierdo, 2022).

19       While a spatial strategy allows for creating shortcuts and is more flexible, individuals under  
20       stress favor a cue response learning strategy. To investigate this shift in strategy preferences  
21       Schwabe et al. (Schwabe et al., 2008) developed a paradigm where mice had to learn the  
22       location of an escape hole on a hole board by either using distal spatial cues for navigation  
23       or respond to a bottle located next to the escape hole. While control mice relied on a spatial  
24       reward-location strategy, chronically stressed mice preferred responding to the proximal  
25       cue. A similar dual solution setup in humans using a computer-based memory game  
26       demonstrated that participants with a higher self-reported stress score shifted towards a  
27       stimulus-response strategy as well. In a follow-up study, the authors could demonstrate that  
28       acute stress, the administration of the stress hormone corticosterone (CORT) and the  
29       activation of mineralocorticoid receptors (MR) induce a similar switch of memory systems  
30       (Schwabe et al., 2010a, 2010b). However, stress and stress hormones have detrimental  
31       effects on hippocampus-dependent learning and long-term potentiation (Roosendaal et al.,  
32       2003; Sandi and Pinelo-Nava, 2007) and may already affect spatial strategy preference by

1 impairing spatial learning but not strategy choice during retrieval. Moreover, detailed  
2 knowledge about possible molecular mechanisms of stress-induced shifts and their location  
3 within the strategy choice neuronal network remains elusive to date.

4 In our current study we investigated the involved neuronal networks and their potential  
5 molecular regulation, focusing on the role of GABAergic interneurons and the key enzyme in  
6 GABA synthesis, glutamic acid decarboxylase (GAD). Within the cortex, hippocampus and  
7 striatum neuronal activity is shaped by local inhibitory interneurons that use GABA as a  
8 neurotransmitter. The GABA-synthetizing enzyme GAD65 critically determines the activity-  
9 dependent GABA pools and expression levels of this enzyme are modulated by stress  
10 exposure as well as corticosterone (Albrecht et al., 2021b; Bergado-Acosta et al., 2008;  
11 Bowers et al., 1998). Mice with a total knock out of GAD65 (GAD65<sup>-/-</sup>) show increased  
12 anxiety, avoidance and hyperarousal as well as a generalized fear memory and deficits in  
13 fear extinction (Müller et al., 2015). They provide an interesting model to further elucidate  
14 molecular mechanisms and a potential contribution of the inhibitory system to strategy  
15 choice in a dual solution paradigm. We therefore compared strategy preferences of GAD65-  
16 <sup>-/-</sup> mice and their wildtype littermates in a dual solution task based on locating a food reward  
17 in the open field. GAD65<sup>-/-</sup> mice did not show a spatial strategy preference, even though  
18 spatial learning was intact in these animals. Analysis of neuronal co-activation of brain  
19 regions via cFos and the analysis of stress-induced expression changes of GAD65 pointed  
20 towards the dorsal dentate gyrus (dDG) as a potential hub for mediating strategy choices via  
21 GAD65. Accordingly, the local knock down of GAD65 in the dDG reproduced a phenotype  
22 reminiscent of the total knock out in the dual solution task and induced an increased  
23 excitability of the DG circuit. Using chemogenetic manipulation of the dDG network to  
24 dissect effects on learning vs. retrieval confirmed the importance of DG excitation/ inhibition  
25 balance for strategy choices during retrieval.

26

27

## 28 **2. Material and methods**

29

### 30 **2.1 Animals**

31 All mice were bred and raised in the animal facility at the Institute of Biology, Otto-von-  
32 Guericke University Magdeburg. The animals were kept in groups of 2–6 on an inverse 12 h

1 light/dark cycle (lights on at 7 pm with a 30 min dawn phase) with food and water *ad*  
2 *libitum*. Animal housing and animal experiments were in accordance with European  
3 regulations for animal experiments and approved by the Landesverwaltungsamt Saxony-  
4 Anhalt (Permission Nr. 42502-2-1177 and -1517). GAD65 knock out mice (GAD65<sup>-/-</sup>) and  
5 their wildtype littermates (GAD65<sup>+/+</sup>) were obtained from a heterozygous breeding and  
6 genotyped with allele-specific polymerase chain reaction as described previously (Stork et  
7 al., 2000). Further mouse lines engaged were wild type C57BL/6BomTac (M&B Taconic,  
8 Germany), SST-Cre (B6(Cg)- Ssttm2.1(cre)Zjh) and PV-Cre (B6;129P2-Pvalbtm1(cre)Arbr/J)  
9 mice. Founders of Cre lines were obtained from Jackson laboratories and maintained in a  
10 homozygous breeding for SST-Cre and a heterozygous breeding for PV-Cre mice with  
11 genotypes being determined with allele-specific polymerase chain reaction using the  
12 supplier's recommendations. From all lines young adult male mice, aged 10-16 weeks, were  
13 used for experiments. All experiments were performed during the dark, active phase of the  
14 animals and handling was done under red light illumination.

15

## 16 **2.2 Stress protocol**

17 Animals were randomly assigned to restrained stress or control group. Restrained animals  
18 were placed in a plastic cylinder (3 cm diameter x 11.5 cm length) with holes for breathing at  
19 the top for 10 min that prevented side movement and restricted movements forth and back.  
20 Home cage controls were handled in a fresh cage in parallel. Afterwards all mice were  
21 returned to their home cage for 24 h until preparation of trunk blood and brain tissue after  
22 decapitation under brief inhalation anesthesia with isoflurane.

23

## 24 **2.3 Corticosterone ELISA**

25 Trunk blood was collected and allowed to clot at room temperature for 30 min. Clotted  
26 material was removed by centrifugation at 3000 rpm for 15 min. Serum was removed  
27 immediately and stored at -80°C until further use. Corticosterone serum levels were  
28 measured with the IBL Corticosterone ELISA kit (IBL International, Hamburg, Germany)  
29 according to the manufacturer's instructions.

30

## 31 **2.4 Dual solution task**

1 Five days before the training of a reward location task, animals were food restricted until  
2 85% of the starting body weight was reached. Everyday each mouse received 4 choco  
3 krispies (Kellogg Deutschland, Hamburg, Germany) in a plastic lab dish (8.5 cm diameter)  
4 within its home cage. For habituation to the training environment, mice were placed for 20  
5 min in an open field (50 cm x 50 cm, 10 lux low light illumination) equipped with patterned  
6 paper cuts as distal cues at the wall. After approximately 45 min break in the homecage,  
7 mice were reintroduced to the open field, this time equipped with 4 plastic lab dishes (8.5  
8 cm diameter) in the center of each quadrant. One of the dishes contained a wooden toy  
9 block (2 cm x 2 cm and 5 cm high) as a proximal cue and a choco krispie placed right next to  
10 it. The other 3 dishes contained 1 choco krispie, but access was restricted by a lid with holes  
11 for olfactory information. The position of the reward and the proximal cue was randomized  
12 across batches but kept consistent over training trials. In each training trial, a mouse was  
13 placed randomly in one of the 2 corners equidistant from the dish with the krispie for start  
14 and were allowed to explore the arena freely for 4 min. The latency to eat the choco krispie  
15 for each trial was assessed as an indicator for learning progress. Each mouse went through 6  
16 training trials with intertrial intervals of approx. 20 min in the home cage.

17 Animals performed a retrieval trial 24 h after training for which the proximal cue was placed  
18 diagonally opposite of the dish which contained the reward previously. Choco krispies were  
19 absent in all dishes during retrieval. Again, the respective mouse started the trial in a corner  
20 and the first head contact with a dish in a 4 min session was noted by an experimenter blind  
21 to genotype and manipulation: a “spatial” choice was made when the mouse entered the  
22 previously rewarded dish, a “cued” choice was noted when the dish with the proximal cue  
23 was chosen and when any of the other 2 dishes was entered, the response was “neither”. If  
24 a mouse did not visit any dish within 4 min, it was classified as “no response”.

25 Spatial learning abilities of GAD65<sup>-/-</sup> mice were tested in separate groups, first by applying  
26 training and testing without any proximal cue and, second, by presenting a proximal cue  
27 during training but not retrieval. As a measure for spatial memory the time spent at the  
28 target position during retrieval was used in these modified paradigms.

29

### 30 **2.5 cFos immunohistochemistry**

31 A subgroup of GAD65<sup>-/-</sup> mice and their GAD65<sup>+/+</sup> littermates received transcatheter  
32 perfusion with phosphate buffered 4% paraformaldehyde solution at pH 6.8, as previously

1 described (Raza et al., 2017). After postfixation overnight in the same fixative and overnight  
2 immersion in wt/vol 20% sucrose at 4°C, brains were cut into 30 µm thick, serial coronar  
3 sections at the level of the PFC, posterior ACC/ dorsal striatum and dorsal hippocampus/  
4 amygdala, stored as free-floating sections in phosphate buffered saline at 4°C and then  
5 incubated with a rabbit antibody against cFos (1:1000, Cell signaling #2250, Danvers, MA,  
6 USA) for 48 h. As secondary antibody biotinylated goat anti-rabbit (1:200, Jackson  
7 ImmunoResearch, Ely, UK) in phosphate buffer (PB) with 0.2% Triton (PBT) was used and  
8 labelled with Cy2 via Streptavidin (1:1000, Jackson ImmunoResearch, Ely, UK) in PB. Nuclei  
9 were visualized with DAPI (300 nM, Thermofischer, Waltham, MA, USA). Immunostainings  
10 were imaged using a DMI6000 epifluorescence microscope (Leica, Wetzlar, Germany) in  
11 both hemispheres from 2 slices per animal and region. cFos-positive cells were counted  
12 manually within the selected brain areas and cell density was normalized to area size  
13 measured with imageJ software. The cell counts per target area were averaged for each  
14 individual animal and used for statistical comparison between groups.

15

## 16 **2.6 qPCR**

17 GAD65<sup>-/-</sup> and GAD65<sup>+/+</sup> mice were sacrificed 24 h after restraint stress by decapitation  
18 under deep anesthesia with isoflurane. Brains were quickly removed and snap frozen in  
19 methylbutane cooled by liquid nitrogen and stored at -80°C. Brains were mounted at a  
20 cryostat at -20°C and coronar sections were removed until the start of the dorsal striatum  
21 (1.34 mm from Bregma). Striatal tissue was harvested with a stainless-steel sample corer  
22 (diameter 0.5 mm, Fine Science Tools, Heidelberg, Germany). Then further sections were  
23 removed until the dorsal pole of the hippocampus emerged (starting at -1.34 mm from  
24 Bregma) and dDG tissue was harvested with a 0.35 mm diameter sample corer (Fine Science  
25 Tools, Heidelberg, Germany). Lysis of tissue samples and isolation of total RNA was  
26 performed with the RNeasy Micro Plus kit (Qiagen, Hilden, Germany) according to  
27 manufacturer's instructions. For first-strand cDNA synthesis the Takara PrimeScript RT-PCR  
28 Kit (Takara Bio, Shiga, Japan) was used with 50 µM Oligo (dT) and 50 µM random hexamer  
29 first strand primers according to the manufacturer's instructions.

30 Real-time PCR was performed with a 1:5 dilution of cDNA using QuantStudio3 real-time PCR  
31 apparatus (Life Technologies) and TaqMan® reagents with predesigned assays for the target  
32 genes GAD65 (alias GAD2, assay ID: Mm00484623\_m1), GAD67 (alias GAD1, assay ID:

1 Mm00725661\_s1), MR (alias NR3C2, assay ID: Mm01241596\_m1) and glucocorticoid  
2 receptors (GR, alias NR3C1, assay ID: Mm00433832\_m1) as well as for the housekeeping  
3 gene Glycerinaldehyd-3-phosphat-Dehydrogenase (GAPDH; endogenous control; Life  
4 Technologies) that was labeled with another fluorescent dye, allowing for quantitative  
5 evaluation. Multiplex PCR samples were run in triplicates with 50 cycles of 15 s at 95°C and 1  
6 min at 60°C, preceded by a 2 min 50°C decontamination step with Uracil-N-glycosidase and  
7 initial denaturation at 95°C for 10 min. Gene expression relative to control groups (relative  
8 quantification, RQ) was calculated using the ddCT method by normalizing the mean cycle  
9 threshold (CT) of each triplicate assay first to the overall content of cDNA using GAPDH as an  
10 internal control ( $dCT; dCT[\text{target gene}] = (CT [\text{target gene}] - (CT [\text{GAPDH}]))$ ) and then to the  
11 control group with  $ddCT = dCT(\text{sample}) - \text{mean } dCT (\text{control group})$ . RQ values were  
12 obtained by calculating  $RQ\% = (2^{-ddCT}) \times 100$ .

13

14

## 15 **2.7 Viral injections**

16 Mice under inhalation anesthesia with isoflurane (1.5-2.5 Vol% in O<sub>2</sub>) were placed on a  
17 stereotaxic frame (World Precision Instruments, Berlin, Germany). 33G injection needles  
18 attached to 10 µl NanoFil microsyringes (World Precision Instruments, Berlin, Germany)  
19 were placed bilaterally in drillholes at -1.94 mm anterioposterior, ±1.3 mm mediolateral  
20 from Bregma and were lowered -1.7 mm dorsoventral from the brain surface into the dorsal  
21 dentate gyrus. Viral vectors were injected bilaterally at a volume of 1 µl/side at a flow rate of  
22 0.1 µl/min using a digital microsyringe pump (World Precision Instruments, Berlin,  
23 Germany).

24 To silence GAD65, a small hairpin RNA construct was generated against the oligonucleotide  
25 sequence 5'-GCATGCTTCCTACCTCTTTCA-3' (corresponding to NM 008078, base pairs 1599-  
26 1619 in mouse and NM\_012563.1, base pairs 1337-1357 in rat) and for control a random  
27 sequence shRNA (5'-TCGTCATGACGTGCATAGG -3') were generated and cloned for  
28 production of lentiviral particles as described and validated in Tripathi et al. (2021). Lentiviral  
29 particles were injected with a concentration of 10<sup>9</sup> particles/µl. Virus spread was determined  
30 by the expression of the marker GFP (see Suppl. Fig. 1). The knock down efficiency for  
31 GAD65 in the mouse hippocampus was determined by western blot protein expression (see  
32 Suppl. Fig. S2).



1  
2 For chemogenetic manipulation of DG circuits designer receptors exclusively activated by  
3 designer drugs (DREADDs)-based tools were employed. The following DREADD adeno-  
4 associated viruses (AAV), which were gifts from Bryan Roth and obtained via Addgene  
5 (Watertown, MA, USA), were used: pAAV-CaMKIIa-hM4D(Gi)-mCherry (Addgene viral prep  
6 #50477-AAV8; <http://n2t.net/addgene:50477>; RRID:Addgene\_50477) and pAAV-CaMKIIa-  
7 GFP (Addgene viral prep #50469-AAV8; <http://n2t.net/addgene:50469>;  
8 RRID:Addgene\_50469) were used for silencing excitatory cells in the DG. hSyn-DIO-hM4Di-  
9 mCherry (Addgene viral prep #44362; <http://n2t.net/addgene:44362>;  
10 RRID:Addgene\_44362), AAV hSyn-DIOhM3Dq-mCherry (Addgene viral prep #44361;  
11 <http://n2t.net/addgene:44361>; RRID:Addgene\_44361) and AAV hSyn-DIO-mCherry  
12 (Addgene viral prep #50459; <http://n2t.net/addgene:50459> ; RRID:Addgene\_50459) were  
13 used for chemogenetically manipulating interneurons in the respective cre-transgenic lines  
14 (Raza et al., 2017). AAVs were injected at  $> 5 \times 10^{12}$  particles/ $\mu$ l.

15 For activation of chemogenetic hM4Di and hM3Dq receptors, animals received an i.p.  
16 injection of 10 mg kg<sup>-1</sup> clozapine-N-oxide (Enzo Life Sciences, Germany) in physiological  
17 saline 1 h before either retrieval or training of the dual solution task.

18 For histological verification of viral vector expression, animals were transcardially perfused  
19 at the end of the experiment and 3-4 alternating 30  $\mu$ m sections of the dorsal hippocampus  
20 (from Bregma AP: -1.58 to AP: -2.18 mm) were imaged using a DMI6000 epifluorescence  
21 microscope (Leica, Wetzlar, Germany). As observed previously, marker expression is  
22 expected in the dendrites and axons of dDG granule cell (Raza et al., 2017). Only mice with a  
23 correct bilateral marker expression in the molecular layer and the mossy fibers of the dDG  
24 were therefore considered for behavioral experiment.

25

## 26 **2.8 Slice electrophysiology**

27 14 to 16 days after the shRNA-mediated viral knock down of GAD65 in the dorsal DG, mice  
28 were decapitated under deep anesthesia with isoflurane and their brains were quickly  
29 removed and submerged into cold ( $\sim 4^{\circ}\text{C}$ ) carbogenated (5% CO<sub>2</sub>/95% O<sub>2</sub>) artificial  
30 cerebrospinal fluid (aCSF, composition in mM: 129 NaCl, 21 NaHCO<sub>3</sub>, 3 KCl, 1.6 CaCl<sub>2</sub>, 1.8  
31 MgSO<sub>4</sub>, 1.25 NaH<sub>2</sub>PO<sub>4</sub>, 10 glucose). Parasagittal brain slices including the transverse-like  
32 dorsal hippocampal sections ( $\sim 400 \mu$ m) were cut from the dorsal pole on an angled platform

1 of approx. 12°. Three to four slices per hemisphere were transferred to an interface chamber  
2 perfused with aCSF at  $30 \pm 0.5^\circ\text{C}$  (flow rate:  $1.8 \pm 0.2$  mL/min, pH 7.4, osmolarity ca. 300  
3 mOsmol/kg) and incubated at least for 90 min before extracellular field recordings were  
4 performed.

5 For dDG electrophysiology (Fig. 3Ci), a bipolar tungsten wire stimulation electrode (with  
6 exposed tips of approx. 20  $\mu\text{m}$ , tip separations of approx. 75  $\mu\text{m}$ , electrode resistance in  
7 ACSF: approx. 100 k $\Omega$ ) was placed at the perforant path (PP) presumably stimulating both  
8 medial and lateral fibers. Population spike (PS) and positive-going field postsynaptic  
9 potential (fEPSP) were recorded with a borosilicate glass electrode filled with aCSF (1-2 M $\Omega$ )  
10 from granule cell layer of DG at 70–100  $\mu\text{m}$  depth as previously described (Albrecht et al.,  
11 2016). Stable PP-induced responses were verified for  $\sim 10$  min (0.033 Hz with pulse durations  
12 of 100  $\mu\text{s}$ ) before obtaining an input–output (I–O) curve (Stimulation intensities in  $\mu\text{M}$ : 10, 20,  
13 30, 40, 50, 75, 100, 150, 200). Paired pulse (PP) responses (Stimulus intervals in ms: 10, 25,  
14 50, 100, 250, 500) were recorded using the  $\sim 50$ –60 % of the maximum PS amplitude.

15 Signals were sampled at a frequency of 5 kHz, pre-amplified with a custom-made amplifier,  
16 low-pass filtered at 3 kHz and stored on a computer hard disc for offline analysis. Evoked  
17 potentials PS and fEPSP were analyzed using MATLAB (MathWorks, Natick, MA) and Spike2-  
18 based analysis tools (CED, Cambridge). For the PP-DG electrophysiology, the slope of  
19 positive-going fPSP was analyzed by calculating the slope (V/s) between the 20 and 80% of  
20 the fEPSP amplitudes. The DG PS amplitude was measured by calculating the average of  
21 peak-to-peak amplitude (mV) of descending and ascending phase of PS. For calculating the  
22 paired-pulse ratio, the magnitude of the second evoked potential was divided by the first  
23 one. For methodological details on mossy fiber-to-CA3 synapse or Schaffer collateral-to-CA1  
24 synapse electrophysiology see supplementary material (Suppl. Fig. 3 and 4).

25

26

## 27 **2.9 Statistics**

28 For all experiments, normal distribution of the data was assessed with Shapiro-Wilk's test.  
29 Equality of variances was tested using Levene's test. Comparisons of two groups were made  
30 with Student's t-test or with Mann-Whitney U-test, in case of non-normal distribution of the  
31 data. In case of unequal variances, a Welch test was applied. For comparing measures over  
32 time (e.g. during dual solution learning), stimulation intensities or intervals (during slice

1 recordings), repeated measure ANOVA was applied, if necessary with Greenhouse-Geißer  
2 corrections for sphericity issues. Correlation of cFos intensities between areas were assessed  
3 using Pearson's correlation coefficient. For comparing the distribution of strategy choices  
4 between groups the likelihood-ratio chi-square ( $X^2$ ) test, optimized for small sample sizes,  
5 was used. For statistical analysis of the data GraphPad Prism software (version 9, SD,  
6 California) and SPSS (version 28, IBM, New York) was used. Differences were considered  
7 statistically significant if p-value ( $p$ ) < 0.05.

8  
9

### 10 **3. Results**

11

#### 12 **3.1 GAD65<sup>-/-</sup> mice preferred a cue-based strategy in the dual solution reward memory** 13 **task.**

14 To assess the stress susceptibility of GAD65<sup>-/-</sup> mice a brief submission to 10 min restrained  
15 stress was performed and CORT serum levels were determined 24 h in trunk blood  
16 (GAD65<sup>+/+</sup> control: n=7; GAD65<sup>+/+</sup> restrained: n=6; GAD65<sup>-/-</sup> control: n=6; GAD65<sup>-/-</sup>  
17 restrained: n=5). CORT levels were elevated in GAD65<sup>-/-</sup> irrespective of stress (Fig. 1A; Mann-  
18 Whitney-U-test for main effects in non-normal distributed data set: U=106, p=0.047). Paired  
19 comparisons revealed that GAD65<sup>-/-</sup> mice had higher serum levels of CORT than their  
20 wildtype littermates under control conditions (control GAD65<sup>+/+</sup> vs. <sup>-/-</sup>: U=38, p=0.014),  
21 while 24 h after restrained stress no genotype differences were observed (restrained  
22 GAD65<sup>+/+</sup> vs. <sup>-/-</sup>: U=18, p=0.662).

23 Both, GAD65<sup>-/-</sup> (n=18) and GAD65<sup>+/+</sup> (n=16) mice learned the food location well during  
24 training in the dual solution task, with a trend to lower latencies in wildtype mice (Fig. 1 B;  
25 Repeated Measure ANOVA with Greenhouse-Geißer correction: trials F(2.466,  
26 78.913)=56.333, p<0.001; trials x genotype F(2.466, 78.913)=0.405, p=0.711; genotype  
27 F(1,32)=3.831, p=0.059). During retrieval, GAD65<sup>+/+</sup> mice showed a preference for a spatial  
28 response strategy, while GAD65<sup>-/-</sup> showed a more diverse response pattern (Fig. 1B;  
29 likelihood-ratio chi square test  $X^2(2)=16.569$ , p=0.001).

30 When no proximal cue was present during training and retrieval, mice of both genotypes  
31 (GAD65<sup>+/+</sup>: n=9; GAD65<sup>-/-</sup>: n=7) spent most of the time during the retrieval in the target  
32 position previously probed with the reward (Fig. 1C; Repeated Measure ANOVA with

1 Greenhouse-Geißer correction for position:  $F(1.067, 14.942)=15.358$ ,  $p=0.001$ ; with  $p<0.01$   
2 for target vs. other positions, LSD posthoc test). No main effects of genotype ( $F(1,14)=2.949$ ,  
3  $p=0.108$ ) nor significant interactions of position x genotype:  $F(1.067, 14.942)=4.062$ ,  $p=0.06$   
4 were observed. GAD65<sup>-/-</sup> mice showed no significantly increased time at the target position  
5 compared to their wildtype littermates (paired comparison, Mann-Whitney-U-test:  $U=44.5$ ,  
6  $p=0.174$ ). When a cue was present during training but not retrieval, mice of both genotypes  
7 (GAD65<sup>+/+</sup>:  $n=8$ ; GAD65<sup>-/-</sup>:  $n=10$ ) spent more time in the target position (Fig. 1D; Repeated  
8 Measure ANOVA for position:  $F(3, 66)=12.255$ ,  $p<0.001$ ; with  $p<0.01$  for target vs. other  
9 positions, LSD posthoc test) and no effects of genotype ( $F(1,22)=1.555$ ,  $p=0.225$ ) or  
10 interactions of position x genotype:  $F(3,66)=1.463$ ,  $p=0.233$ ) were observed. Thus, while  
11 stress-susceptible GAD65<sup>-/-</sup> mice lost the spatial preference observed in GAD65<sup>+/+</sup> mice in a  
12 dual solution task, they were able to acquire spatial information for the reward location and  
13 could use this information for retrieval if no other option was available.

14

### 15 **3.2 Interregional interaction and GAD65 expression regulation after stress point** 16 **towards the dDG as a hub for stress-related effects**

17 After the retrieval, the number of cFos-positive neurons (per area) was counted in selected  
18 brain regions of spatial-preferring GAD65<sup>+/+</sup> mice ( $n=5$ ) vs. GAD65<sup>-/-</sup> with a cue-based  
19 retrieval choice ( $n=5$ ). No significant differences were observed in any of the selected areas  
20 (Fig. 2A; T-/ Mann-Whitney-U-Tests for PL/IL:  $T(8)=0.843$ ,  $p=0.424$ ; ACC:  $T(8)=-0.141$ ,  
21  $p=0.891$ ; striatum:  $T(8)=-0.211$ ,  $p=0.838$ ; DG:  $T(8)=0.583$ ,  $p=0.576$ ; CA1:  $T(8)=0.318$ ,  $p=0.758$ ;  
22 CA3:  $T(8)=-0.539$ ,  $p=0.604$ ; LA:  $T(8)=0.912$ ,  $p=0.388$ ; BLA:  $T(8)=0.458$ ,  $p=0.659$ ; CeA:  $U=14$ ,  
23  $p=0.814$ ). However, a co-activation analysis using Pearson's correlation co-efficient revealed  
24 negative correlations between the prefrontal areas (PL/IL) or the ACC and the dDG, as well  
25 as a positive correlation between the dDG and the central amygdala in GAD65<sup>+/+</sup> mice with  
26 a spatial preference. In GAD65<sup>-/-</sup> mice the correlation patterns of the DG with prefrontal  
27 cortical areas, the striatum and the amygdala appeared reversed between groups (see Fig.  
28 2B for color-coded correlation coefficients).

29 An important role of the dDG in mediating stress-related effects on dual solution strategy  
30 choice was further supported by the expression analysis 24 h after restrained stress ( $n=5-6$   
31 for control,  $n=6$  for restrained). Such a brief stressor before training has been shown to shift  
32 retrieval strategies, at least in part via CORT signaling on mineralocorticoid receptors (MR).

1 24 h after restrained stress, mRNA levels of MR were increased in the dDG of GAD65+/+  
2 mice (Fig. 2Ci;  $T(10)=-2.343$ ,  $p=0.041$ ), while the other receptor for CORT, GR, remained  
3 unchanged ( $T(10)=-0.433$ ,  $p=0.674$ ). Moreover, in wildtype mice restrained stress lastingly  
4 reduced the expression of GAD65 in the dDG (Fig. 2Ci; Mann-Whitney-U-test,  $U=3$ ,  $p=0.03$ ),  
5 but not GAD67 (T-test,  $T(9)=0.114$ ,  $p=0.912$ ). The expression of MR and GR was not altered  
6 in the dDG of GAD65-/- mice 24 h after restrained stress (Fig. 2Cii; MR: T-test  $T(11)=0.572$ ,  
7  $p=0.579$ ; GR: T-test  $T(11)=0.541$ ,  $p=0.6$ ). In the dorsal striatum no changes in expression  
8 levels were observed in GAD65+/+ mice (Fig. 2Di; GAD65: Welch-tests for unequal variances,  
9  $T(8.212)=0.041$ ,  $p=0.968$ ; GAD67: T-test  $T(10)=1.361$ ,  $p=0.203$ ; MR:  $T(10)=-0.157$ ,  $p=0.878$ ;  
10 GR:  $T(10)=-1.09$ ,  $p=0.301$ ) and in GAD65-/- mice (Fig. 2Dii; MR: T-test  $T(11)=-1.817$ ,  $p=0.097$ ;  
11 GR: T-test  $T(11)=-0.466$ ,  $p=0.65$ ).  
12 Together, these data suggested a relevant role for the dDG in stress responses and GAD65  
13 expression regulation in wildtype mice that prompted us to specifically target this region in  
14 the dual solution task.

15

### 16 **3.3 Local knock down of GAD65 in the dDG is sufficient to induce a loss of spatial** 17 **strategy preference in the dual solution task**

18 Based on the co-activation analysis, we then used a recently established shRNA-mediated  
19 lentiviral vector for GAD65 knock down and injected it into the dDG (Tripathi et al., 2021).  
20 Two weeks after virus injection training in the dual solution task took place. Mice with the  
21 local GAD65 knock down (GAD65 KD,  $n=18$ ) acquired the task as successfully as mice injected  
22 with a control vector containing a random sh sequence (CTR,  $n=16$ ; Fig. 3B; Repeated  
23 Measure ANOVA with Greenhouse-Geisser correction: trials:  $F(2.023,64.734)=46.477$ ,  
24  $p<0.001$ ; trials x group:  $F(2.023,64.734)=0.426$ ,  $p=0.657$ ; group:  $F(1,32)=1.386$ ,  $p=0.248$ ).  
25 Different strategy choice patterns were visible during retrieval 24h later (Fig. 3B;  
26  $X^2(2)=6.478$ ,  $p=0.039$ ), with CTR but not GAD65 KD mice showing a spatial preference.

27 To assess the impact of GAD65 KD on excitability of the dDG, perforant-path induced fEPSP  
28 and PS responses were recorded in the DG granule layer in slices prepared from a different  
29 set of CTR and GAD65 KD mice (Fig. 3Ci). Analysis of I/O curves revealed an increased  
30 somatic fEPSP slopes in GAD65 KD slices (Fig. 3Cii; Repeated Measure ANOVA with  
31 Greenhouse-Geisser correction: stimulation intensity  $F(1.397,39.12)=86.93$ ,  $p<0.0001$ ;  
32 stimulation intensity x group:  $F(8,224)=6.352$ ,  $p<0.0001$ ; group:  $F(1,28)=5.965$ ,  $p=0.0212$ )

1 and PS amplitudes (Fig. 3Ciii; Repeated Measure ANOVA with Greenhouse-Geißer  
2 correction: stimulation intensity  $F(2.396, 67.09)=63.80$ ,  $p<0.0001$ ; stimulation intensity x  
3 group:  $F(8,224)=3.205$ ,  $p=0.0018$ ; group:  $F(1,28)=2.931$ ,  $p=0.0979$ ). Accordingly, the  
4 maximum evoked somatic fEPSP slope (Fig. 3Civ; Mann-Whitney-U-test,  $U=39$ ,  $p=0.0027$ ) as  
5 well as PS amplitude (Fig. 3Cv; T-test,  $T(28)=2.327$ ,  $p=0.0274$ ) were increased in slices from  
6 GAD65 KD mice. When determining paired pulse responses as a measure of short term  
7 plasticity, no significant differences were observed after GAD65 KD for the somatic fEPSP  
8 slopes (Fig. 3Cvi; Repeated Measure ANOVA with Greenhouse-Geißer correction: interval  
9  $F(3.361, 87.39)=17.12$ ,  $p<0.0001$ ; interval x KD  $F(5,130)=1.366$ ,  $p=0.2411$ ; KD  
10  $F(1,26)=0.01234$ ,  $p=0.9124$ ) and for the PS amplitudes (Fig. 3Cvii: Repeated Measure ANOVA  
11 with Greenhouse-Geißer correction: interval:  $F(1.664, 46.59)=64.26$ ,  $p<0.0001$ ; interval x  
12 group:  $F(5,140)=0.2413$ ,  $p=0.9435$ ; group:  $F(1,28)=0.5033$ ,  $p=0.4839$ ).

13 Of note, we found no evidence for altered neurotransmission and plasticity in the MF-CA3  
14 (Suppl. Fig. 3) and SC-CA1 (Suppl. Fig. 4) synapses in hippocampal slices of GAD65 KD mice,  
15 indicating that GAD65 KD induced changes in the excitability of dDG remain local without  
16 altering baseline synaptic transmission and plasticity in the downstream regions of the  
17 hippocampal trisynaptic circuit.

18 Taken together, a local GAD65 knock down in the dDG induced a similar phenotype in the  
19 dual solution task as the total knock out of GAD65 and increased the excitability of this  
20 structure, thereby suggesting an important role of dDG excitability in spatial strategy  
21 preference.

22

### 23 **3.4 Modulation of dDG excitatory activity during retrieval affects strategy choices**

24 To dissect whether inhibition by dDG interneurons modulates strategy choices during dual  
25 solution task retrieval, chemogenetic activation and inhibition of interneurons before  
26 retrieval were performed via DREADDs in interneuron-specific cre-driver lines (Fig. 4A). SST-  
27 Cre mice were used to target somatostatin-positive (SST(+)) interneurons in the dDG and to  
28 increase (hM3Dq,  $n=8$ ) or reduce (hM4Di,  $n=8$ ) their activity, in comparison to controls (CTR,  
29  $n=9$ ). The groups did not differ in their learning performance, as expected (Fig. 4B; Repeated  
30 Measure ANOVA with Greenhouse-Geißer correction for trial  $F(2.784,61.243)=18.357$ ,  
31  $p<0.001$ ; trial x group  $F(5.568,61.243)=0.846$ ,  $p=0.533$ ; group  $F(2,22)=1.934$ ,  $p=0.168$ ).  
32 Modulating SST(+) interneuron activity by CNO ligand injection before retrieval induced no

1 differences and all groups showed spatial dominating response patterns (Fig. 4B, upper  
2 panel;  $X^2(4)=0.196$ ,  $p=0.906$ ). Manipulating parvalbumin-positive (PV(+)) interneurons was  
3 achieved by injecting activating (hM3Dq,  $n=10$ ), inactivating (hM4Di,  $n=10$ ) and control  
4 constructs (CTR,  $n=9$ ) in the dDG of PV-Cre-mice and applying CNO again 1 h before retrieval.  
5 As expected, training 24 h earlier was not affected (Fig. 4B, lower panel; Repeated Measure  
6 ANOVA with Greenhouse-Geißer correction for trial  $F(1.788,50.063)=42.462$ ,  $p<0.001$ ; trial x  
7 group  $F(3.567,50.063)=1.381$ ,  $p=0.256$ ; group:  $F(2,28)=1.793$ ,  $p=0.185$ ). Activating or  
8 inactivating PV(+) did not shift response patterns significantly either (Fig. 5C;  $X^2(2)=3.714$ ,  
9  $p=0.446$ ). However, spatial preference was less established in control animals of this strain  
10 (50% in PV CTR) compared to all other control mouse cohorts used in this study, suggesting  
11 strain effects.

12 For comparison, dDG excitatory cells were chemogenetically inhibited before retrieval by  
13 using inhibitory DREADD constructs under the CamKII promotor (Fig. 4C; hM4Di,  $n=14$ ; vs.  
14 control construct,  $n=13$ ). Both, hM4Di and the CTR groups learned the location of the reward  
15 well during training (Fig. 4B; Repeated Measure ANOVA with Greenhouse-Geißer correction  
16 for trial  $F(1.476,36.9)=28.779$ ,  $p<0.001$ ; trial x group interaction  $F(1.476,36.9)=2.642$ ,  
17  $p=0.099$ ; group  $F(1,25)=3.919$ ,  $p=0.059$ ). After inactivating excitatory DG cells during  
18 retrieval, strategy choices were shifted from spatial pattern in CTR to cue-based strategy in  
19 the hM4Di groups (Fig. 4D;  $X^2(2)=6.924$ ,  $p=0.031$ ). Noteworthy, inhibiting DG activity before  
20 training did not induce a shift in strategy choice (Suppl. Fig. 5). Together, a direct  
21 contribution of either SST- or PV-positive DG interneuron populations to strategy choices  
22 during dual solution retrieval could not be confirmed, despite their potential role in  
23 modulating DG excitability. Targeting, excitatory cells of the dDG during retrieval, however,  
24 induced a strategy shift, suggesting a specific role of this region in strategy choice during  
25 retrieval rather than in acquiring strategies during training.

26

27

#### 28 **4. Discussion**

29 The adaptation to stress involves various neurophysiological and behavioral responses,  
30 including a switch from previously acquired spatial to cue-based search strategies (Schwabe  
31 et al., 2010a, 2010b, 2008). Our findings suggest that these alterations involve a regulation

1 of inhibitory functions in the dDG, via regulation of the GABA synthesizing enzyme GAD65,  
2 and excitability of the DG granule cells.

3 As one of the two isoenzymes synthesizing GABA, GAD65 expression is regulated in an  
4 activity-dependent manner and is modulated by stress exposure (Albrecht et al., 2021b;  
5 Bergado-Acosta et al., 2008; Bowers et al., 1998). GAD65<sup>-/-</sup> mice display a behavioral  
6 phenotype associated with a maladaptation to challenging environments, including  
7 increased anxiety, increased fear memory as well as a heightened generalization of  
8 conditioned fear and reduced fear extinction (see (Müller et al., 2015), for review). In the  
9 current study increased plasma levels of corticosterone were observed in GAD65<sup>-/-</sup> mice  
10 handling controls, already without previous exposure to restrained stress. While basal  
11 differences in corticosterone levels had not been observed in previous studies (Stork et al.,  
12 2003), likely due to differences in rearing and analysis conditions including circadian rhythm,  
13 they further support the notion of an altered stress response system in these mice.

14 Stress and elevated CORT levels have been shown to induce a shift in strategy preference in  
15 mice favoring stimulus-response based strategies (Schwabe et al., 2010a). We therefore  
16 tested unstressed, naïve GAD65<sup>-/-</sup> mice in a dual solution foraging task, based on locating a  
17 food reward in an open field. Like in other protocols based on aversive and appetitive stimuli  
18 (see (Goodman, 2021), for review), mice have the option to build either a spatial map and  
19 navigate in relation to distal cues like signs at the walls or to respond to cues placed  
20 proximal to the goal, in our case the food reward. After establishing both strategies during  
21 the memory acquisition phase, the preferred solution strategy can be assessed during  
22 retrieval by moving the proximal cue to a different position. Mice will then either direct their  
23 search to the cue or to the trained location (spatial solution). GAD65<sup>+/+</sup> mice preferred a  
24 spatial strategy in that case, as seen in wildtype mice in other dual solution paradigms e.g.  
25 using a holeboard (Schwabe et al., 2008). GAD65<sup>-/-</sup> mice, however, showed a cued response  
26 in 50% of the individuals, as observed previously in chronically or acutely pre-stressed mice  
27 (Schwabe et al., 2008, 2009). Importantly, GAD65<sup>-/-</sup> mice showed in our protocol no  
28 aversion against novel food nor any alterations in activity or anxiety-like behavior in the  
29 open field (see Suppl. Fig. 6, 20-min habituation before the dual solution training), thereby  
30 rendering confounding effects of heightened anxiety on learning or retrieval unlikely.

31 Across different dual solution paradigms, stress hormones such as CORT and activation of  
32 the basolateral amygdala have been demonstrated to induce stress-related shifts of strategy



1 choices (Packard, 2009; Packard and Goodman, 2012). As these factors may impair spatial  
2 memory acquisition (Roosendaal et al., 2003; Sandi and Pinelo-Nava, 2007), we tested  
3 whether GAD65<sup>-/-</sup> mice have a spatial learning deficit. However, these mice were able to  
4 acquire spatial memory for a food reward when only a spatial solution was available or when  
5 the proximal cue was absent during the retrieval. This suggests that GAD65<sup>-/-</sup> mice have no  
6 spatial learning or memory deficit per se, in line with undisturbed context processing in  
7 aversive fear conditioning paradigms (Bergado-Acosta et al., 2008; Sangha et al., 2009).  
8 Together, unstressed GAD65<sup>-/-</sup> mice prefer a cue-based response strategy just like stressed  
9 mice in previous studies, but neither disturbed emotional processing nor spatial learning  
10 deficits appear accountable for this effect.

11 Previous studies suggest that both systems, hippocampus and dorsal striatum, are activated  
12 during dual solution training and their cellular activity relates to strategy choices (Kathirvelu  
13 and Colombo, 2013; Yagi et al., 2017). Studies in humans and rodents show that decision  
14 making processes such as choosing an appropriate strategy also depend on the mPFC and  
15 ACC (Rich and Shapiro, 2009; Rudebeck and Izquierdo, 2022). Using the neuronal activity  
16 marker cFos, we mapped neuronal activation in these brain regions and found no  
17 differences in neuronal activation patterns of spatial-preferring GAD65<sup>+/+</sup> vs. cued-  
18 preferring GAD65<sup>-/-</sup> mice, further supporting that hippocampus and striatum-based retrieval  
19 systems are intact in GAD65<sup>-/-</sup> mice. However, when correlating activities between brain  
20 areas, we noted a shift in the co-activation specifically of the dDG with prefrontal cortical  
21 areas and the central amygdala areas between genotypes, indicative of a change in  
22 functional connectivity.

23 The dDG is perfectly suited to integrate cognitive processes and emotional arousal and  
24 plasticity and is modulated by stress and amygdala activation (Albrecht et al., 2021a; Fa et  
25 al., 2014). Information processing in the DG is achieved by strong inhibition via GABAergic  
26 interneurons that form local networks with the excitatory granule cells (Acsády and Káli,  
27 2007) and may mediate stress effects and the impact of GAD65 deficiency on strategy  
28 preferences. We therefore assessed whether a brief restrained stress exposure, a procedure  
29 that induced a shift in strategy choice in previous studies (Schwabe et al., 2010b), alters the  
30 expression of GAD65 in the dDG of wildtype mice. Indeed, GAD65 mRNA expression was  
31 reduced in the dDG while remaining unaltered in the striatum of GAD65<sup>+/+</sup> mice. Moreover,  
32 an increased expression of MR was observed in the dDG of GAD65<sup>+/+</sup> mice, but not in their

1 striatum. In GAD65<sup>-/-</sup> mice MR levels remained unchanged in the dDG and only a slight, but  
2 insignificant increase in MR expression was visible in the striatum, further supporting an  
3 altered regulation of the stress axis in GAD65<sup>-/-</sup> mice. The activation of MR has previously  
4 been linked to the stress-induced strategy shift in dual solution paradigms. An orally  
5 administered MR antagonist could prevent stress-induced shifts in strategy choices  
6 (Schwabe et al., 2010a), while mice overexpressing MR in excitatory neurons showed a  
7 stronger switch to cued response strategies after stress (ter Horst et al., 2012). Thus,  
8 increased MR levels in the dDG of wildtype mice after stress underline a possible central role  
9 of the dDG.

10 Accordingly, we then commenced by mimicking a molecular aspect of stress exposure by  
11 reducing the expression of GAD65 only in the dDG using lentiviral vectors. This treatment  
12 clearly replicated the lack of spatial strategy preference observed in the total GAD65<sup>-/-</sup> mice.  
13 Field recordings in DG slices from such animals demonstrated that a GAD65 knock down  
14 furthermore increased excitability of dDG circuits without altering paired pulse responses.  
15 Previous studies in GAD65<sup>-/-</sup> mice found a reduced paired pulse inhibition, but only in the  
16 CA1 area (Tian et al., 1999). The current results suggest a heightened excitability of the DG,  
17 in accordance with a reduced inhibitory activity due to GAD65 knock down.

18 Two major populations of GABAergic interneurons shape the local circuits of the DG. We  
19 next investigated therefore their potential impact on strategy choices in the dual solution  
20 task by chemogenetic intervention. This approach also allowed for a targeted manipulation  
21 of the training vs. retrieval phase. First, we manipulated somatostatin interneurons, which  
22 are predominantly located in the hilus of the dDG and mediate inhibition of distal dendrites  
23 of excitatory granule cells (Tallent, 2007). These cells control the size of engrams for  
24 contextual representations (Raza et al., 2017; Stefanelli et al., 2016) and play a role in spatial  
25 memory formation (Morales et al., 2021). However, neither activating nor inactivating  
26 somatostatin-positive interneurons before retrieval affected strategy choices, leaving spatial  
27 preference undisturbed in the dual solution paradigm. We then tested parvalbumin-positive  
28 interneurons, which represent mostly basket and chandelier cells located close to the  
29 granule cell layer that mediate inhibition near the soma and proximal dendrites of granule  
30 cells (Bartholome et al., 2020). Their chemogenetic activation in the DG has been shown to  
31 reduce anxiety and to enhance contextual fear memory extinction (Zou et al., 2016). In our  
32 experiments, activating PV-positive interneurons resulted in about 70% of mice choosing a

1 cued response strategy. However, only 50% of the control vector-injected mice of the PV-Cre  
2 mouse line showed a preference for the spatial solution, suggesting a genetic background  
3 effect and different basal behavior of this mouse line in the dual solution paradigm. While it  
4 is intriguing to speculate that increased dDG inhibition by activating PV-positive  
5 interneurons may contribute to shifts in strategy choices, future experiments using different  
6 interventional approaches are necessary to answer this question.

7 Finally, in addition to manipulating specific interneuron populations, we used a  
8 chemogenetic vector that allowed for the inhibition of excitatory cells of the dDG (under  
9 control of the CamKIIa promotor). The use of an activating chemogenetic construct in these  
10 mice however had to be abandoned after pilot experiments, since the locomotor activity of  
11 the animals was low and side effects such as seizures were frequently observed. Focusing on  
12 inactivating DG excitatory cells before retrieval, we observed a shift towards a cue-  
13 preference. By contrast, inactivating the excitatory dDG cells before training did not induce  
14 such a shift (see Suppl. Fig. 5). Together, these findings suggest that either increasing (via  
15 GAD65 knock down and potentially also by blocking PV interneurons) or decreasing the  
16 excitability of the DG (via chemogenetic inhibition of excitatory cells) both induces a shift  
17 towards cue-based strategies specifically in the retrieval phase of the dual solution  
18 paradigm. This suggests that an optimum excitation/ inhibition balance in the dDG is  
19 required for its proper functioning within a strategy choice network that may comprise the  
20 striatum and frontal cortical areas. Moreover, a recent study demonstrates that mossy cells  
21 of the hilus respond as well to objects explored in specific spatial configurations (GoodSmith  
22 et al., 2022). Mossy cells are the second excitatory cell population of the dDG next to granule  
23 cells. They are located in the hilus, receive inputs from granule cells as well as from back  
24 projections of CA3 and they target other mossy cells, granule but also basket cells.  
25 Depending on neuromodulatory inputs (i. e. acetylcholinergic inputs), mossy cells can  
26 provide a feed forward inhibition of granule cells, but also directly activate sparse granule  
27 cell populations (Schafman, 2016). They may therefore provide a switch for DG activity  
28 during the dual solution task depending on arousal and comprise an interesting target to  
29 study local circuits of the DG in future studies.

30

## 31 **5. Conclusions and future perspectives**

32

1 Setting out to investigate neuronal circuits underlying memory-based foraging strategies, we  
2 identified an unexpected role of the DG in mediating strategy selection during memory  
3 retrieval. Alterations in GAD65-mediated inhibition in the DG seem to provide a molecular  
4 mechanism of such an adaptive response. It is well known that the dDG is embedded in a  
5 functional network of decision-making processes, comprising for example the mPFC, the ACC  
6 and the anterior thalamic nucleus (Méndez-Couz et al., 2015), that may support its role as a  
7 hub for strategy selection. In fact, cFos-based regional activation analysis indicated altered  
8 functional interaction of DG and ACC in GAD65<sup>-/-</sup> mice during the dual solution task. Direct  
9 hippocampal inputs to the frontal cortex stem mainly from the ventral hippocampal CA1  
10 areas but not the DG (Eichenbaum, 2017), but a knock down of GAD65 in the DG resulted in  
11 no alterations of excitability of CA1 or CA3 (see Suppl. Fig. 3 and 4). One promising relay  
12 station to be considered is the supramammillary nucleus (SUM), which projects  
13 bidirectionally to the ACC, to the PFC and specifically to the dorsal DG (Pan and  
14 McNaughton, 2004) and synchronizes its activity with the dDG during spatial memory  
15 retrieval (Li et al., 2020). Deconstructing this network and the contribution of such PFC-dDG-  
16 relay stations to spatial and cue-based information processing and retrieval will be an  
17 attractive task for future studies and may provide novel insights in networks of decision-  
18 making processes.

19

20

21

## 22 **Acknowledgement**

23 We thank Franziska Blitz, Antje Koffi von Hoff, Romina Wolter and Annika Lenuweit for  
24 excellent technical assistance and Gina M. Krause for assistance with the behavior  
25 experiments.

26

## 27 **Funding**

28 This work was supported by grants from the Leibniz Postdoctoral Network fellowship to  
29 Anne Albrecht and Iris Müller (SAW-2015-LIN-3), from the German Research Foundation  
30 (Projects CRC779-B5 and 362321501/RTG 2413 SynAGE to Oliver Stork; Project-ID  
31 425899996 – CRC 1436 to Anne Albrecht and Oliver Stork) and from the Center for  
32 Behavioural Brain Sciences Magdeburg - CBBS funded by the European funds for regional

1 development (EFRE, Funding Nr ZS/2016/04/78113). Evangelia Pollali is a PhD student of ESF  
2 graduate school ABINEP (Funded by the federal state Saxony-Anhalt and the European  
3 Structural and Investment Funds, project number ZS/2016/08/80645).

4

5 **Declaration of interest**

6 None

7

8

## 1 References

2

3 Acsády, L., Káli, S., 2007. Models, structure, function: the transformation of cortical signals  
4 in the dentate gyrus, in: Progress in Brain Research. Elsevier, pp. 577–599.

5 [https://doi.org/10.1016/S0079-6123\(07\)63031-3](https://doi.org/10.1016/S0079-6123(07)63031-3)

6 Albrecht, A., Ben-Yishay, E., Richter-Levin, G., 2021a. Behavioral profiling reveals an  
7 enhancement of dentate gyrus paired pulse inhibition in a rat model of PTSD. *Molecular and*  
8 *Cellular Neuroscience* 111, 103601. <https://doi.org/10.1016/j.mcn.2021.103601>

9 Albrecht, A., Ivens, S., Papageorgiou, I.E., Çalışkan, G., Saiepour, N., Brück, W., Richter-Levin,  
10 G., Heinemann, U., Stork, O., 2016. Shifts in excitatory/inhibitory balance by juvenile stress:  
11 A role for neuron-astrocyte interaction in the dentate gyrus: Inhibition by Juvenile Stress via  
12 Astrocytes. *Glia* n/a-n/a. <https://doi.org/10.1002/glia.22970>

13 Albrecht, A., Segal, M., Stork, O., 2021b. Allostatic gene regulation of inhibitory synaptic  
14 factors in the rat ventral hippocampus in a juvenile/adult stress model of psychopathology.  
15 *Eur J Neurosci* ejn.15091. <https://doi.org/10.1111/ejn.15091>

16 Bartholome, O., de la Brassinne Bonardeaux, O., Neirinckx, V., Rogister, B., 2020. A  
17 Composite Sketch of Fast-Spiking Parvalbumin-Positive Neurons. *Cerebral Cortex*  
18 *Communications* 1, tgaa026. <https://doi.org/10.1093/texcom/tgaa026>

19 Bergado-Acosta, J.R., Sangha, S., Narayanan, R.T., Obata, K., Pape, H.-C., Stork, O., 2008.  
20 Critical role of the 65-kDa isoform of glutamic acid decarboxylase in consolidation and  
21 generalization of Pavlovian fear memory. *Learn. Mem.* 15, 163–171.  
22 <https://doi.org/10.1101/lm.705408>

23 Bowers, G., Cullinan, W.E., Herman, J.P., 1998. Region-Specific Regulation of Glutamic Acid  
24 Decarboxylase (GAD) mRNA Expression in Central Stress Circuits. *J. Neurosci.* 18, 5938–5947.  
25 <https://doi.org/10.1523/JNEUROSCI.18-15-05938.1998>

26 Cowen, S.L., Davis, G.A., Nitz, D.A., 2012. Anterior cingulate neurons in the rat map  
27 anticipated effort and reward to their associated action sequences. *Journal of*  
28 *Neurophysiology* 107, 2393–2407. <https://doi.org/10.1152/jn.01012.2011>

29 Eichenbaum, H., 2017. Prefrontal–hippocampal interactions in episodic memory. *Nat Rev*  
30 *Neurosci* 18, 547–558. <https://doi.org/10.1038/nrn.2017.74>

31 Fa, M., Xia, L., Anunu, R., Kehat, O., Kriebel, M., Volkmer, H., Richter-Levin, G., 2014. Stress  
32 modulation of hippocampal activity – Spotlight on the dentate gyrus. *Neurobiology of*  
33 *Learning and Memory* 112, 53–60. <https://doi.org/10.1016/j.nlm.2014.04.008>

34 Goodman, J., 2021. Place vs. Response Learning: History, Controversy, and Neurobiology.  
35 *Front. Behav. Neurosci.* 14, 598570. <https://doi.org/10.3389/fnbeh.2020.598570>

36 GoodSmith, D., Kim, S.H., Puliyadi, V., Ming, G., Song, H., Knierim, J.J., Christian, K.M., 2022.  
37 Flexible encoding of objects and space in single cells of the dentate gyrus. *Current Biology*  
38 32, 1088-1101.e5. <https://doi.org/10.1016/j.cub.2022.01.023>

39 Kathirvelu, B., Colombo, P.J., 2013. Effects of lentivirus-mediated CREB expression in the  
40 dorsolateral striatum: Memory enhancement and evidence for competitive and cooperative  
41 interactions with the hippocampus: Creb Expression in Dorsal Striatum and Memory.  
42 *Hippocampus* 23, 1066–1074. <https://doi.org/10.1002/hipo.22188>

43 Kennerley, S.W., Walton, M.E., Behrens, T.E.J., Buckley, M.J., Rushworth, M.F.S., 2006.  
44 Optimal decision making and the anterior cingulate cortex. *Nat Neurosci* 9, 940–947.  
45 <https://doi.org/10.1038/nn1724>

46 Li, Y., Bao, H., Luo, Y., Yoan, C., Sullivan, H.A., Quintanilla, L., Wickersham, I., Lazarus, M.,  
47 Shih, Y.-Y.I., Song, J., 2020. Supramammillary nucleus synchronizes with dentate gyrus to

- 1 regulate spatial memory retrieval through glutamate release. *eLife* 9, e53129.  
2 <https://doi.org/10.7554/eLife.53129>
- 3 Méndez-Couz, M., Conejo, N.M., González-Pardo, H., Arias, J.L., 2015. Functional interactions  
4 between dentate gyrus, striatum and anterior thalamic nuclei on spatial memory retrieval.  
5 *Brain Research* 1605, 59–69. <https://doi.org/10.1016/j.brainres.2015.02.005>
- 6 Morales, C., Morici, J.F., Espinosa, N., Sacson, A., Lara-Vasquez, A., García-Pérez, M.A.,  
7 Bekinschtein, P., Weisstaub, N.V., Fuentealba, P., 2021. Dentate Gyrus Somatostatin Cells  
8 are Required for Contextual Discrimination During Episodic Memory Encoding. *Cerebral*  
9 *Cortex* 31, 1046–1059. <https://doi.org/10.1093/cercor/bhaa273>
- 10 Müller, I., Çalışkan, G., Stork, O., 2015. The GAD65 knock out mouse - a model for GABAergic  
11 processes in fear- and stress-induced psychopathology: The GAD65 knock out mouse in  
12 psychiatric research. *Genes, Brain and Behavior* 14, 37–45.  
13 <https://doi.org/10.1111/gbb.12188>
- 14 Packard, M.G., 2009. Anxiety, cognition, and habit: A multiple memory systems perspective.  
15 *Brain Research* 1293, 121–128. <https://doi.org/10.1016/j.brainres.2009.03.029>
- 16 Packard, M.G., Goodman, J., 2013. Factors that influence the relative use of multiple  
17 memory systems: Factors that Influence the use of Multiple Memory Systems. *Hippocampus*  
18 23, 1044–1052. <https://doi.org/10.1002/hipo.22178>
- 19 Packard, M.G., Goodman, J., 2012. Emotional arousal and multiple memory systems in the  
20 mammalian brain. *Front. Behav. Neurosci.* 6. <https://doi.org/10.3389/fnbeh.2012.00014>
- 21 Pan, W.-X., McNaughton, N., 2004. The supramammillary area: its organization, functions  
22 and relationship to the hippocampus. *Progress in Neurobiology* 74, 127–166.  
23 <https://doi.org/10.1016/j.pneurobio.2004.09.003>
- 24 Raza, S.A., Albrecht, A., Çalışkan, G., Müller, B., Demiray, Y.E., Ludewig, S., Meis, S., Faber, N.,  
25 Hartig, R., Schraven, B., Lessmann, V., Schwegler, H., Stork, O., 2017. HIPP neurons in the  
26 dentate gyrus mediate the cholinergic modulation of background context memory salience.  
27 *Nat Commun* 8, 189. <https://doi.org/10.1038/s41467-017-00205-3>
- 28 Rich, E.L., Shapiro, M., 2009. Rat Prefrontal Cortical Neurons Selectively Code Strategy  
29 Switches. *Journal of Neuroscience* 29, 7208–7219.  
30 <https://doi.org/10.1523/JNEUROSCI.6068-08.2009>
- 31 Roozendaal, B., Griffith, Q.K., Buranday, J., de Quervain, D.J.-F., McGaugh, J.L., 2003. The  
32 hippocampus mediates glucocorticoid-induced impairment of spatial memory retrieval:  
33 Dependence on the basolateral amygdala. *Proceedings of the National Academy of Sciences*  
34 100, 1328–1333. <https://doi.org/10.1073/pnas.0337480100>
- 35 Rudebeck, P.H., Izquierdo, A., 2022. Foraging with the frontal cortex: A cross-species  
36 evaluation of reward-guided behavior. *Neuropsychopharmacol.* 47, 134–146.  
37 <https://doi.org/10.1038/s41386-021-01140-0>
- 38 Sandi, C., Pinelo-Nava, M.T., 2007. Stress and Memory: Behavioral Effects and  
39 Neurobiological Mechanisms. *Neural Plasticity* 2007, 1–20.  
40 <https://doi.org/10.1155/2007/78970>
- 41 Sangha, S., Narayanan, R.T., Bergado-Acosta, J.R., Stork, O., Seidenbecher, T., Pape, H.-C.,  
42 2009. Deficiency of the 65 kDa Isoform of Glutamic Acid Decarboxylase Impairs Extinction of  
43 Cued But Not Contextual Fear Memory. *Journal of Neuroscience* 29, 15713–15720.  
44 <https://doi.org/10.1523/JNEUROSCI.2620-09.2009>
- 45 Schwabe, L., Dalm, S., Schächinger, H., Oitzl, M.S., 2008. Chronic stress modulates the use of  
46 spatial and stimulus-response learning strategies in mice and man. *Neurobiology of Learning*  
47 *and Memory* 90, 495–503. <https://doi.org/10.1016/j.nlm.2008.07.015>
- 48 Schwabe, L., Schächinger, H., de Kloet, E.R., Oitzl, M.S., 2010a. Corticosteroids Operate as a

- 1 Switch between Memory Systems. *Journal of Cognitive Neuroscience* 22, 1362–1372.  
2 <https://doi.org/10.1162/jocn.2009.21278>
- 3 Schwabe, L., Schächinger, H., de Kloet, E.R., Oitzl, M.S., 2010b. Stress impairs spatial but not  
4 early stimulus–response learning. *Behavioural Brain Research* 213, 50–55.  
5 <https://doi.org/10.1016/j.bbr.2010.04.029>
- 6 Stefanelli, T., Bertollini, C., Lüscher, C., Muller, D., Mendez, P., 2016. Hippocampal  
7 Somatostatin Interneurons Control the Size of Neuronal Memory Ensembles. *Neuron* 89,  
8 1074–1085. <https://doi.org/10.1016/j.neuron.2016.01.024>
- 9 Stork, O., Yamanaka, H., Stork, S., Kume, N., Obata, K., 2003. Altered conditioned fear  
10 behavior in glutamate decarboxylase 65 null mutant mice: **Fear behavior of GAD65 knock**  
11 **out mice**. *Genes, Brain and Behavior* 2, 65–70. [https://doi.org/10.1034/j.1601-](https://doi.org/10.1034/j.1601-183X.2003.00008.x)  
12 [183X.2003.00008.x](https://doi.org/10.1034/j.1601-183X.2003.00008.x)
- 13 Tallent, M.K., 2007. Somatostatin in the dentate gyrus, in: *Progress in Brain Research*.  
14 Elsevier, pp. 265–284. [https://doi.org/10.1016/S0079-6123\(07\)63016-7](https://doi.org/10.1016/S0079-6123(07)63016-7)
- 15 ter Horst, J.P., van der Mark, M.H., Arp, M., Berger, S., de Kloet, E.R., Oitzl, M.S., 2012. Stress  
16 or no stress: Mineralocorticoid receptors in the forebrain regulate behavioral adaptation.  
17 *Neurobiology of Learning and Memory* 98, 33–40.  
18 <https://doi.org/10.1016/j.nlm.2012.04.006>
- 19 Tian, N., Petersen, C., Kash, S., Baekkeskov, S., Copenhagen, D., Nicoll, R., 1999. The role of  
20 the synthetic enzyme GAD65 in the control of neuronal gamma -aminobutyric acid release.  
21 *Proceedings of the National Academy of Sciences* 96, 12911–12916.  
22 <https://doi.org/10.1073/pnas.96.22.12911>
- 23 Tripathi, K., Demiray, Y.E., Kliche, S., Jing, L., Hazra, S., Hazra, J.D., Richter-Levin, G., Stork, O.,  
24 2021. Reducing glutamic acid decarboxylase in the dorsal dentate gyrus attenuates juvenile  
25 stress induced emotional and cognitive deficits. *Neurobiology of Stress* 15, 100350.  
26 <https://doi.org/10.1016/j.ynstr.2021.100350>
- 27 Yagi, S., Drewczynski, D., Wainwright, S.R., Barha, C.K., Hershorn, O., Galea, L.A.M., 2017. Sex  
28 and estrous cycle differences in immediate early gene activation in the hippocampus and the  
29 dorsal striatum after the cue competition task. *Hormones and Behavior* 87, 69–79.  
30 <https://doi.org/10.1016/j.yhbeh.2016.10.019>
- 31 Zou, D., Chen, L., Deng, D., Jiang, D., Dong, F., McSweeney, C., Zhou, Y., Liu, L., Chen, G., Wu,  
32 Y., Mao, Y., 2016. DREADD in Parvalbumin Interneurons of the Dentate Gyrus Modulates  
33 Anxiety, Social Interaction and Memory Extinction. *CMM* 16, 91–102.  
34 <https://doi.org/10.2174/1566524016666151222150024>

35

36

37



1 **Figure Legends**

2 **Fig. 1: Strategy preference in GAD65<sup>-/-</sup> mice. (A)** GAD65<sup>-/-</sup> mice showed elevated  
3 corticosterone serum levels already under baseline control conditions that were not further  
4 elevated 24 h after a brief restraint stress episode, suggesting altered stress susceptibility.  
5 **(B)** In the dual solution task (scheme on top), GAD65<sup>-/-</sup> mice showed a good learning  
6 performance of the reward location over 6 trials. When tested for their strategy preference  
7 24 h later, they did not display a spatial preference in comparison to their wildtype  
8 littermates. **(C)** When the experimental setup only allowed for a spatial solution in order to  
9 learn the reward location, GAD65<sup>-/-</sup> mice showed a spatial preference for the reward  
10 location during retrieval. **(D)** Similarly, when a cue was present during training but not during  
11 retrieval, GAD65<sup>-/-</sup> mice still displayed a spatial preference similar to their wildtype  
12 littermates. All values means  $\pm$  sem. \* significant difference between genotypes,  $p < 0.05$ ; \*\*\*  
13  $p < 0.001$ ; +++ significant learning effect over trials,  $p < 0.001$ ; \$\$ significant difference of  
14 target position compared to other positions,  $p < 0.01$ ; \$\$\$  $p < 0.001$ .

15

16 **Fig. 2: Interregional activation patterns during dual solution retrieval and GAD65**  
17 **expression regulation after stress point towards the dDG as a hub for stress-related**  
18 **effects. (A)** GAD65<sup>-/-</sup> mice and their wildtype littermates were trained in the dual solution  
19 task and perfused 1 h after retrieval brains for subsequent cFos analysis. Example images are  
20 shown for cFos labeling (green: cFos; cyan: DAPI nuclear staining; white arrow head:  
21 exemplary cFos-positive cell; scale bar = 100  $\mu$ m) in the dorsal dentate gyrus. No difference  
22 in the number of cFos positive cells was evident in any of the regions analyzed between  
23 GAD65<sup>+/+</sup> mice preferring a spatial solution (n=5) and GAD65<sup>-/-</sup> mice using cue-based  
24 strategy (n=5). **(B)** Interregional correlations of cFos activation after DS retrieval and strategy  
25 choice demonstrated shifts in co-activation of the dDG together with PL/IL, and CeA in  
26 between the groups. **(C)** The dDG was also susceptible to gene expression changes induced  
27 by restrained stress. In (i) GAD65<sup>+/+</sup> mice GAD65 mRNA levels were downregulated and  
28 mineralocorticoid receptor (MR) upregulated 24h after brief restrained stress, while (ii) MR  
29 expression was unaltered in GAD65<sup>-/-</sup> mice (n=5-7 per group). **(D)** In comparison, no stress-  
30 induced expression changes were observed in the striatum of (i) GAD65<sup>+/+</sup> and (ii) GAD65<sup>-/-</sup>  
31 mice (n=5-7 per group). Expression of the isoform GAD67 and of the glucocorticoid receptor

1 (GR) remained unchanged in both regions. All values means $\pm$ sem. + significant Pearson's  
2 correlation,  $p < 0.05$ ; ++  $p < 0.01$ ; \* significant difference between genotypes,  $p < 0.05$ .

3

4 **Fig. 3: Local knock down of GAD65 in the dDG leads to loss of spatial preference in a dual**

5 **solution task. (A)** Vector scheme and workflow for local knock down of GAD65 in the dDG

6 before dual solution training and retrieval. **(B)** The local knock down of GAD65 in the dDG is

7 sufficient to replicate the phenotype of total GAD65<sup>-/-</sup> mice. **(C)** Electrophysiological profile

8 of the dDG after local GAD65 knock down (CTR: n=18 slices from 9 animals; GAD65 KD: n=12

9 slices from 8 animals). (i) Scheme for perforant-path induced somatic field postsynaptic

10 potential (fEPSP) and population spike (PS) responses. Input-output (I/O) curves

11 demonstrate an enhanced excitability after GAD65 KD in the dDG evident by (ii) increased

12 fEPSP slope and (iii) PS amplitudes. (iv) Accordingly, the maximum evoked fEPSP slope and

13 (v) PS amplitude is increased in GAD65 KD slices. No differences in the paired pulse ratios

14 were observed for (vi) the fEPSP slopes or (vii) the PS amplitudes. All values means $\pm$ sem.

15 +++ significant learning effect over trials,  $p < 0.001$ ; \* significant difference from CTR group,

16  $p < 0.05$ , \*\*  $p < 0.01$ , \*\*\*  $p < 0.001$ . &&&  $p < 0.001$ , significant stimulus intensity effect.

17

18 **Fig. 4. Modulation of dDG excitatory activity during retrieval affects strategy choices. (A)**

19 Scheme for chemogenetic activation/ inhibition of somatostatin (SST)- and parvalbumin

20 (PV)-positive interneurons during dual solution retrieval. **(B, upper panel)** Activation or

21 inhibition of dDG SST(+) cells during dual solution retrieval did not affect strategy choice

22 (CTR: n=9; 3Dq: n=8; 4Di: n=8). **(B, lower panel)** Activation or inhibition of PV(+)

23 interneurons during dual solution retrieval did not affect strategy choice significantly, but

24 spatial strategy preference appeared diminished in the PV-hM3Dq group (not significant;

25 CTR: n=9; 3Dq: n=10; 4Di: n=10). **(C)** For comparison, chemogenetic inhibition of excitatory

26 dDG cells was achieved using CamKII-hM4Di constructs. Expression of the marker mCherry is

27 observed in the molecular layer and mossy fibers, containing dendritic and axonal

28 compartments of dDG granule cells. **(D)** Inhibiting excitatory cell activity during retrieval

29 induced a strategy shift with a loss of spatial preference (n=14; CTR: n=13). All groups did not

30 differ in their training performance. All values means $\pm$ sem. +++ significant learning effect

31 over trials,  $p < 0.001$ ; \* significant difference to CTR group,  $p < 0.05$ .

32

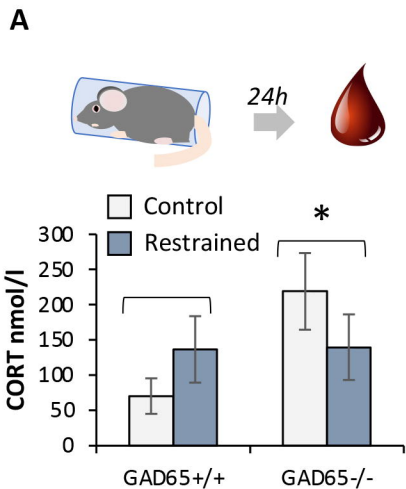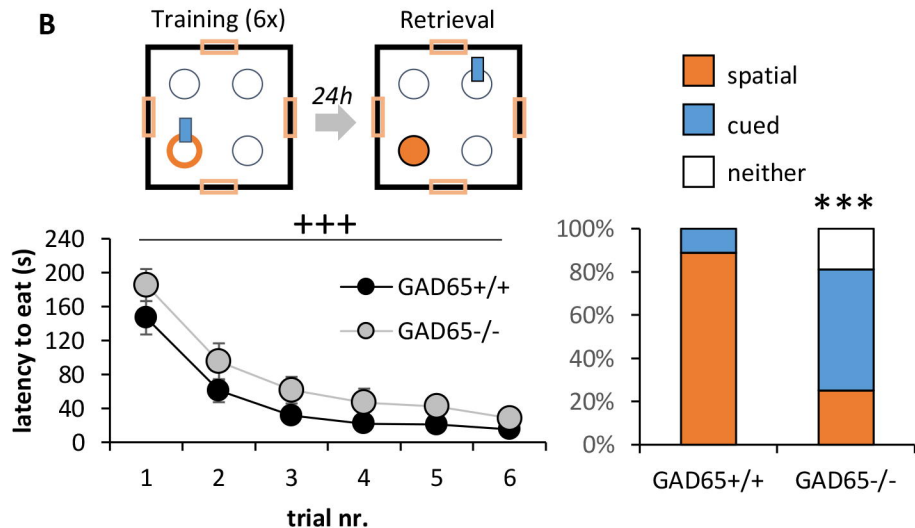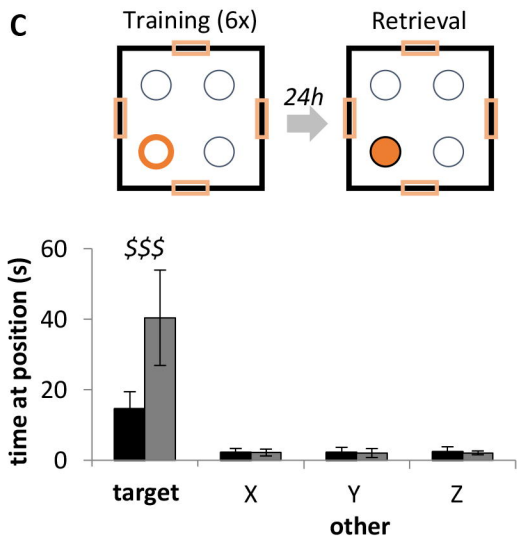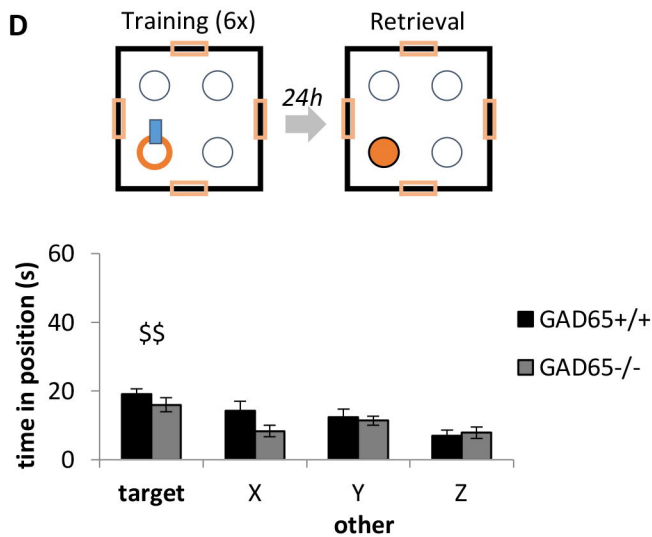

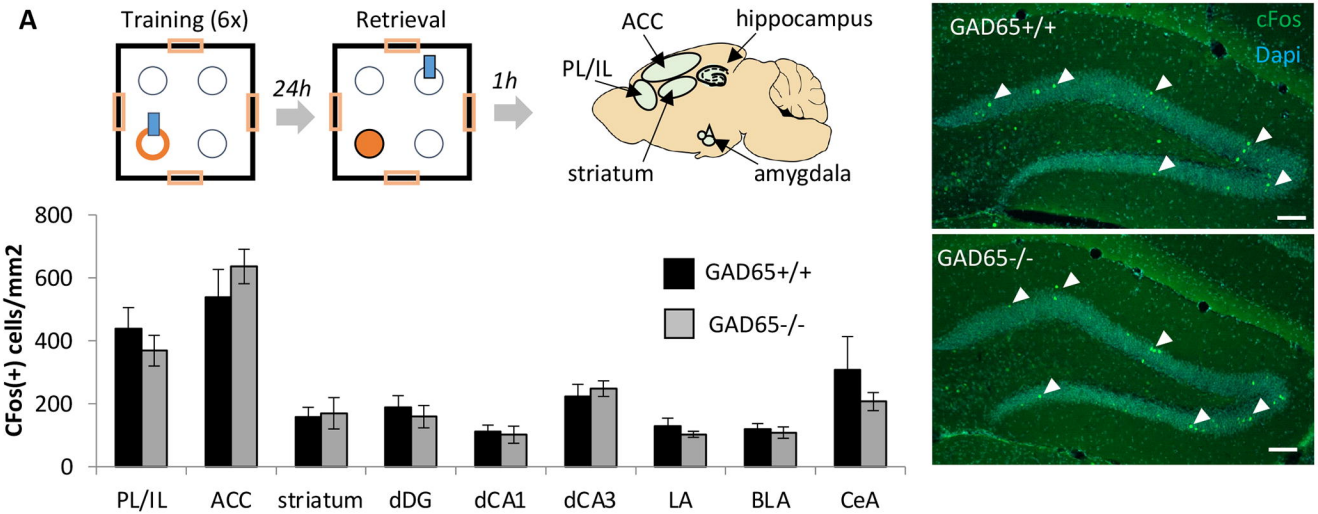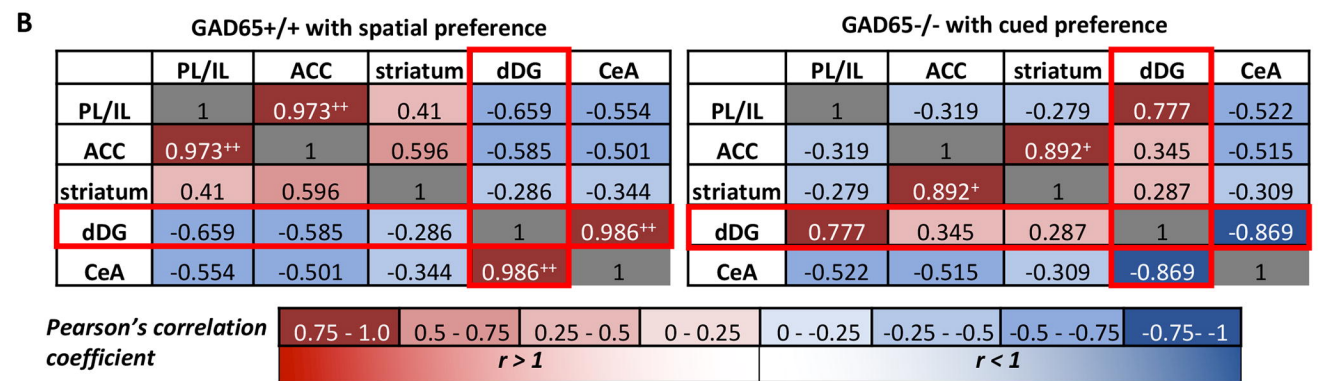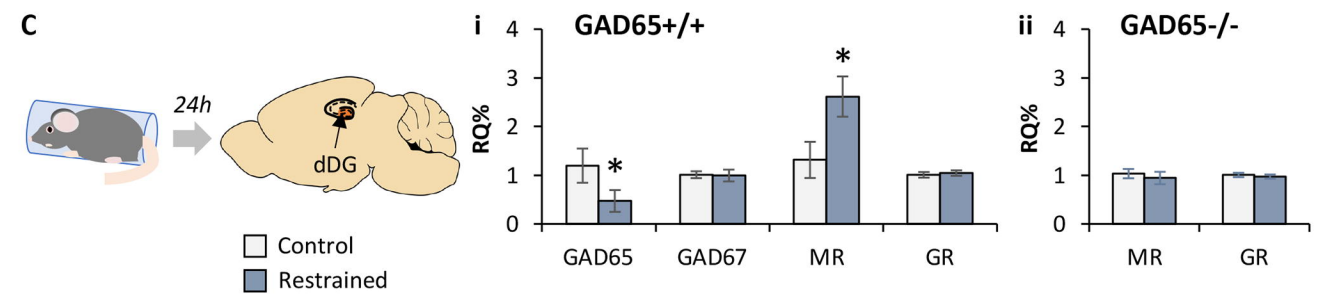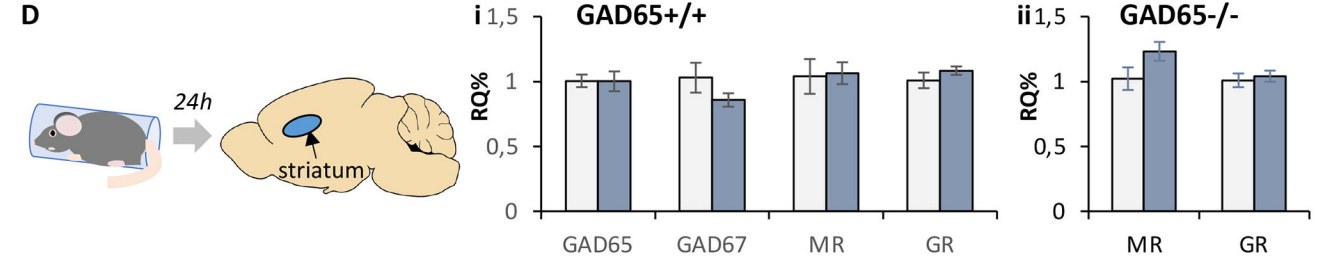

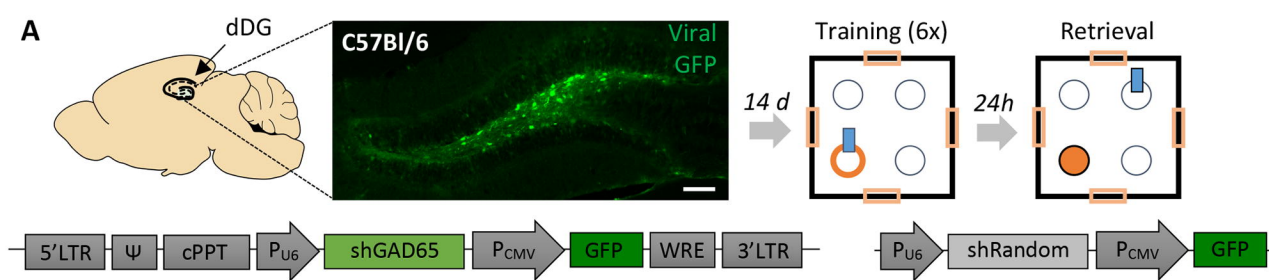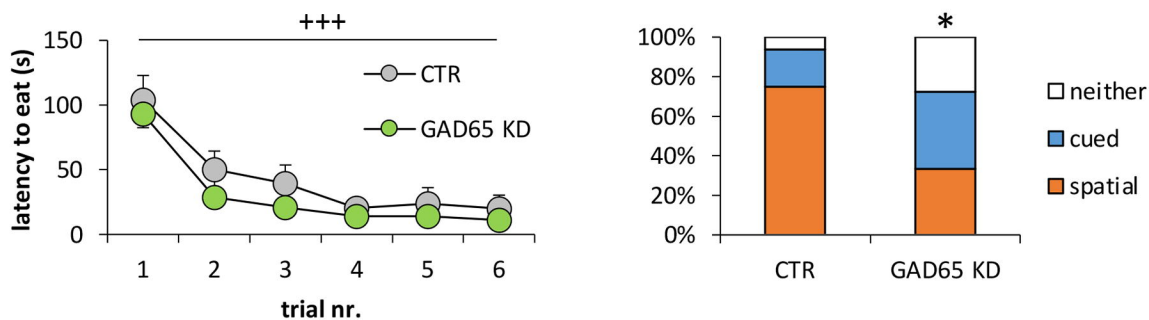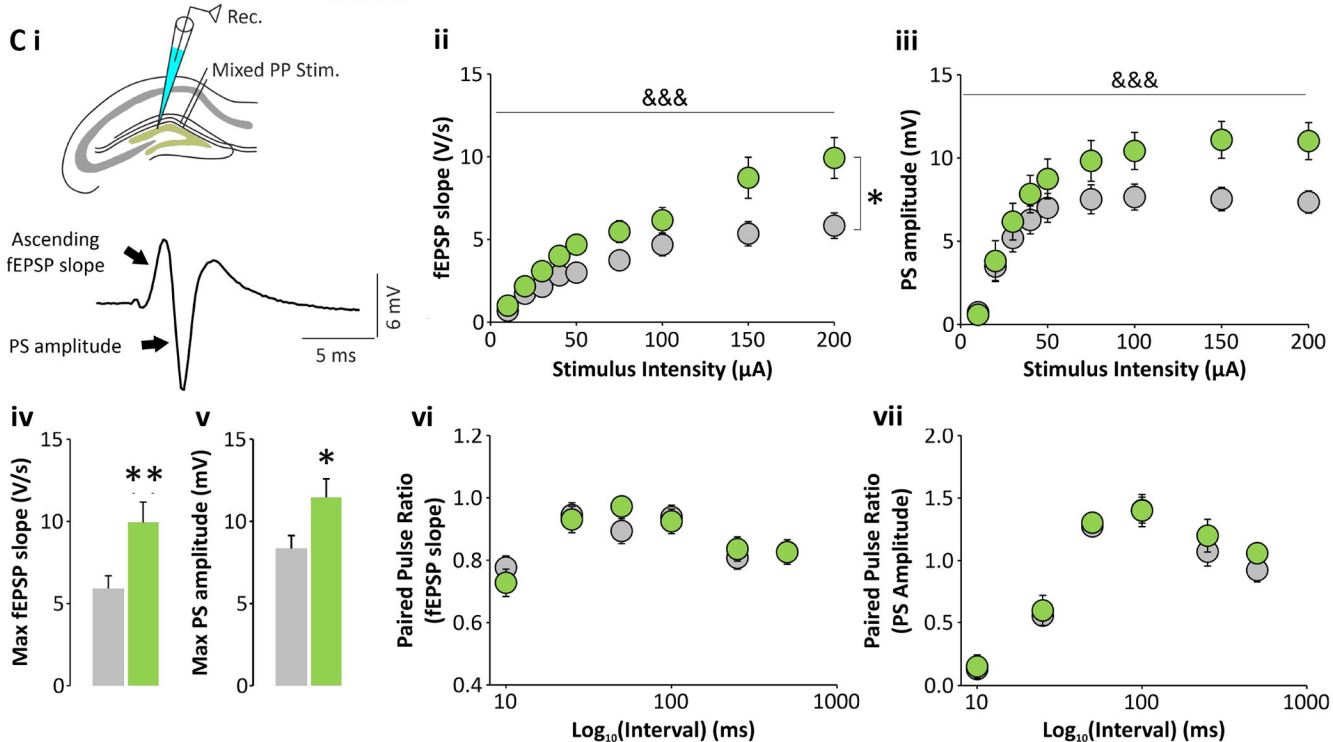

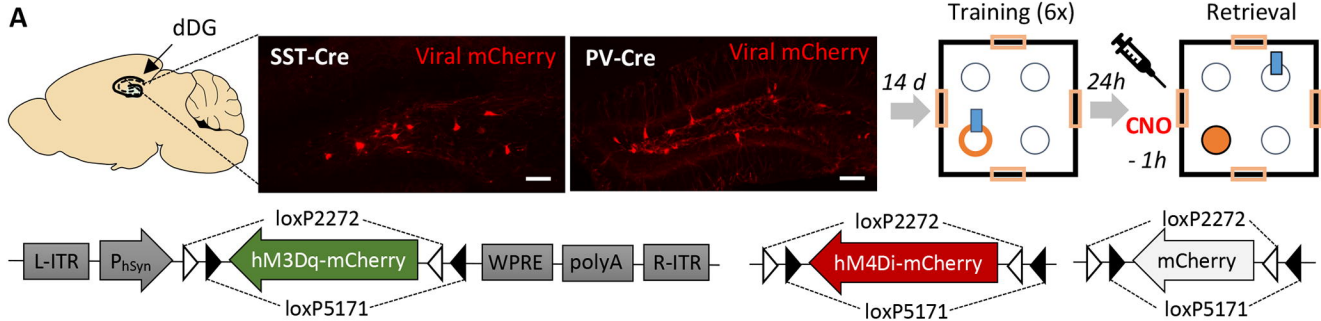

**B** Inhibition/ Activation of SST interneurons

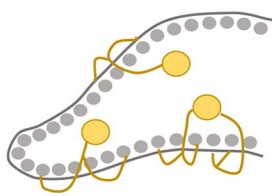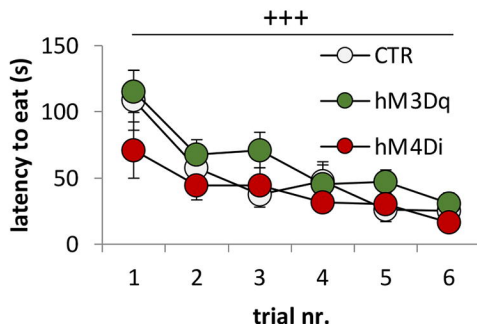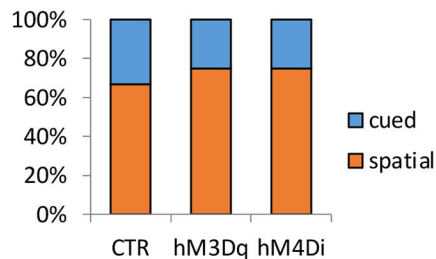

Inhibition/ Activation of PV interneurons

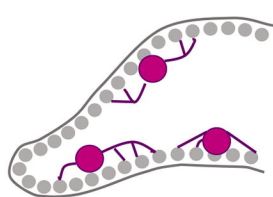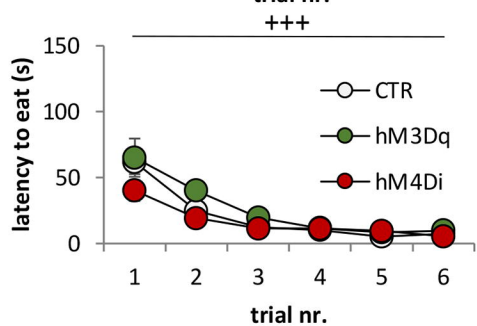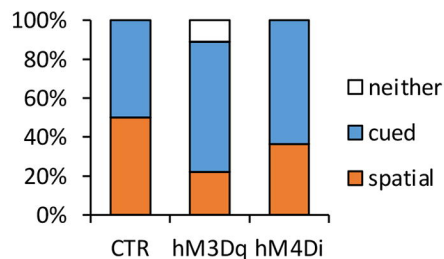

**C**

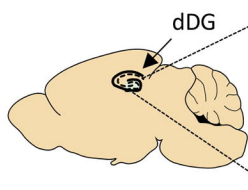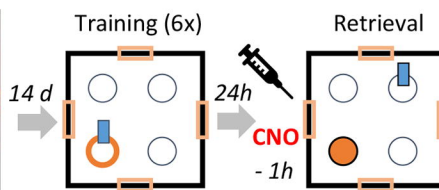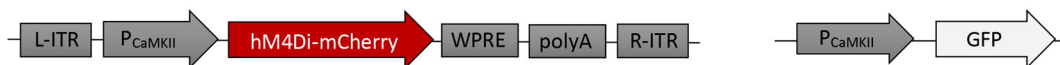

**D** Inhibition of excitatory cells

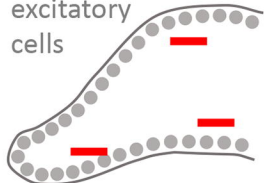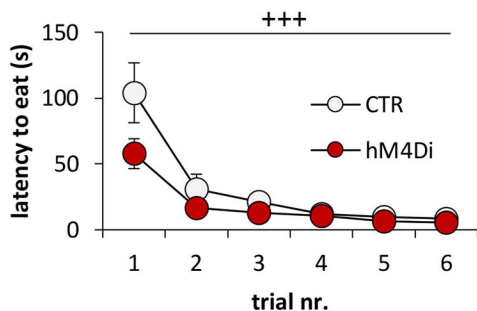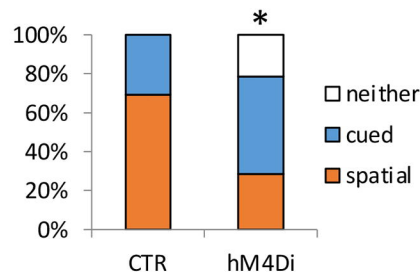

Source: https://www.biorxiv.org/content/10.1101/2022.05.02.490267v2.full.pdf
